# Supplementary material for: Cytogenetic Assessment and Risk Stratification in Myelofibrosis with Optical Genome Mapping
Source: MDPI journal article supplement (doi:10.3390/cancers15113039), 2023-06-02
Supplement: s1 [file s1]

| Patient | UHMW DNA                  |        | Labeling          |        | Run parameters    |                  |                                 |              |                    |         |             |                |
|---------|---------------------------|--------|-------------------|--------|-------------------|------------------|---------------------------------|--------------|--------------------|---------|-------------|----------------|
|         | DNA concentration (ng/μl) | DNA CV | DNA concentration | DNA CV | Avg N50 (≥150kpb) | Avg N50 (≥20kpb) | Avg Label Density 14-17 /100kbp | Avg Map Rate | Effective Coverage | Avg PLV | Avg NLV     | DNA collected  |
|         | 36-150                    | <0,3   | 4-12              | <0,3   | >230              | >150             |                                 | >70%         | >300x              | <10%    | <15%        | >1500 Gbp      |
| 1       | 88,23                     | 0,14   | <b>12,80</b>      | 0,10   | 338               | 290              | 15,93                           | 94,5         | 470,50             | 2,9     | 5,0         | 1537,29        |
| 2       | 103,70                    | 0,14   | 9,17              | 0,01   | 297               | 260              | 15,66                           | 93,7         | 466,79             | 3,4     | 5,3         | 1538,05        |
| 3       | 142,00                    | 0,12   | 5,29              | 0,03   | 255               | 214              | 15,33                           | 92,2         | 447,96             | 4,1     | 6,0         | 1500,20        |
| 4       | 115,67                    | 0,10   | 7,39              | 0,07   | 292               | 244              | 16,78                           | 89,9         | 450,02             | 3,3     | 5,2         | 1546,23        |
| 5       | 87,93                     | 0,05   | 4,02              | 0,03   | <b>214</b>        | 156              | 15,36                           | 80,3         | 325,46             | 7,9     | 7,6         | <b>1253,21</b> |
| 6       | 119,40                    | 0,23   | 4,37              | 0,09   | <b>200</b>        | <b>138</b>       | 15,25                           | 77,7         | <b>283,51</b>      | 7,7     | 7,8         | <b>1128,00</b> |
| 7       | 42,77                     | 0,28   | 11,40             | 0,01   | 240               | <b>131</b>       | 15,37                           | 79,9         | 393,00             | 2,7     | 9,4         | 1522,86        |
| 8       | 76,53                     | 0,04   | 4,27              | 0,00   | <b>193</b>        | <b>120</b>       | 16,57                           | <b>61,3</b>  | <b>224,62</b>      | 5,0     | 7,2         | <b>1148,68</b> |
| 9       | 88,60                     | 0,09   | 7,98              | 0,02   | <b>220</b>        | <b>117</b>       | 15,57                           | 87,2         | 425,00             | 3,9     | 6,1         | 1505,00        |
| 10      | 104,63                    | 0,09   | 6,84              | 0,01   | <b>199</b>        | <b>146</b>       | 15,65                           | 86,4         | 420,83             | 3,2     | 5,5         | 1503,77        |
| 11      | 108,33                    | 0,09   | 5,38              | 0,01   | 265               | 204              | 15,89                           | 90,0         | 444,21             | 3,8     | 5,4         | 1523,00        |
| 12      | 106,67                    | 0,04   | 7,34              | 0,01   | 274               | 228              | 16,00                           | 92,9         | 463,56             | 4,3     | 5,0         | 1541,47        |
| 13      | 93,03                     | 0,04   | 8,43              | 0,05   | 263               | 201              | 15,95                           | 91,3         | 458,31             | 4,5     | 5,7         | 1549,97        |
| 14      | 134,33                    | 0,05   | 4,85              | 0,01   | 245               | 202              | 16,68                           | 87,0         | 423,00             | 5,5     | 5,8         | 1502,00        |
| 15      | 142,33                    | 0,04   | 7,02              | 0,07   | 252               | 190              | 16,12                           | 90,0         | 444,00             | 5,6     | 5,9         | 1524,00        |
| 16      | 114,67                    | 0,08   | 4,71              | 0,00   | 261               | 202              | 15,40                           | 90,0         | 444,00             | 5,1     | 5,6         | 1523,00        |
| 17      | 70,97                     | 0,06   | 7,38              | 0,01   | 251               | 196              | 15,31                           | 89,3         | 434,63             | 3,2     | 8,8         | 1502,84        |
| 18      | 84,80                     | 0,11   | 10,03             | 0,01   | 321               | 256              | 18,44                           | 71,7         | 350,39             | 3,5     | 14,5        | 1509,16        |
| 19      | 66,20                     | 0,07   | 5,46              | 0,01   | 235               | 186              | 15,69                           | 83,9         | 326,56             | 3,3     | 10,4        | <b>1205,50</b> |
| 20      | 40,80                     | 0,07   | 10,60             | 0,01   | 229               | 182              | 14,84                           | 87,1         | 423,63             | 1,9     | 12,7        | 1502,39        |
| 21      | 44,07                     | 0,10   | 9,54              | 0,08   | 230               | 165              | 14,03                           | 81,2         | 394,41             | 1,9     | <b>17,1</b> | 1500,43        |
| Mean    | 88,71                     | 0,08   | 6,94              | 0,03   | 248,42            | 186,11           | 15,78                           | 85,19        | 399,20             | 3,86    | 7,18        | 1448,64        |
| SD      | 31,23                     | 0,03   | 2,31              | 0,01   | 76,37             | 88,39            | 1,34                            | 9,40         | 53,80              | 0,71    | 8,56        | 26,06          |
| Median  | 93,03                     | 0,09   | 7,34              | 0,01   | 251               | 196              | 15,66                           | 87,2         | 425                | 3,8     | 6           | 1505           |

The third row indicates the desired values according to the manufacturer's recommendations (Bionano Genomics).

Bold values indicate that they are out of range according to the protocol.

**Abbreviations:** UHMW DNA = Ultra-High Molecular Weight DNA; UHMW DNA concentration = average UHMW DNA concentration obtained after 3 measurements of the sample after a vortex of at least 30 seconds and quantified with Qubit dsDNA BR Assay; UHMW DNA CV = Coefficient of Variation (CV = standard deviation/mean) from the three readings; Labeled DNA concentration = average Labeled DNA concentration obtained after 2 measurements of the sample after a vortex of at least 30 seconds and quantified with Qubit dsDNA HS Assay; Labeled DNA CV = Coefficient of Variation (CV = standard deviation/mean) from the two readings; Avg N50 (≥150kpb) = N50 of DNA molecules that are 150kbp or longer; Avg N50 (≥20kpb) = N50 of the molecules that are 20kbp or longer; Avg Label Density = Average number of labels per 100 kbp for the molecules that are 150kbp or longer; Avg Map Rate = Percentage of molecules that are 150kbp or longer mapped to the reference; Effective Coverage = Total amount of aligned DNA divided by the size of the reference genome times the map rate; Avg PLV = Percentage of labels absent in reference; Avg NLV = Percentage of reference labels absent in molecules; DNA collected = Total amount of DNA from molecules that are 150kbp or longer. ST = Standard Deviation

**Table S1:** Optical Genome Mapping Quality Parameters.

|         | Rare variant pipeline                |     |            | De novo assembly                     |     |            |
|---------|--------------------------------------|-----|------------|--------------------------------------|-----|------------|
| Patient | SV                                   | VAF | Confidence | SV                                   | VAF | Confidence |
| 1       | No relevant SVs detected             | -   | -          | No relevant SVs detected             | -   | -          |
| 2       | No relevant SVs detected             | -   | -          | No relevant SVs detected             | -   | -          |
| 3       | No relevant SVs detected             | -   | -          | No relevant SVs detected             | -   | -          |
| 4       | 1q31.3q44(194830658_248943333)x3     | 10% | 0.88       | 1q21.2q44(148647980_248943333)x3     | 10% | 0.88       |
|         | 6p25.3p22.1(76216_27868248)x1        | 10% | 0.76       | 6p25.3p22.3(76216_19002568)x1        | 14% | 1          |
|         | t(12;17)(q24.31;p13.1)               | 19% | 0.99       | t(12;17)(q24.31;p13.1)               | 11% | 0.61       |
|         | Xq11.1q28 (63301777_155792271)x1     | 10% | 0.41       | Xq11.1q28 (62521449_156025612)x1     | 10% | 0.73       |
| 5       | 1q21.1q44(145439805_248943333)x3     | 33% | 1          | 1q21.1q44(144234187_248943333)x3     | 31% | 1          |
|         | 7q11.21q36.3(62332055_159334984)x1   | 31% | 1          | 7q11.21 q36.3 (62332055_157634263)x1 | 31% | 1          |
|         | (9)x3                                | 30% | 1          | (9)x3                                | 30% | 1          |
| 6       | 4q24(105025784_105410120)x1          | 6%  | 0.99       | No relevant SVs detected             | -   | -          |
| 7       | No relevant SVs detected             | -   | -          | No relevant SVs detected             | -   | -          |
| 8       | No relevant SVs detected             | -   | -          | No relevant SVs detected             | -   | -          |
| 9       | No relevant SVs detected             | -   | -          | 9p24.2p13.3(0_35495657)x2 hmz        | -   | -          |
| 10      | t(2;11)(q37.1;q23.2)                 | 54% | 0.98       | t(2;11)(q37.1;q23.2)                 | 40% | 0.6        |
|         | 7p21.1p14.3(20628867_30992020)x1     | 49% | 1          | 7p21.1p14.3(20628867_31009519)x1     | 47% | 1          |
|         | t(7;11)(q31.31;q24.1)                | 47% | 0.97       | t(7;11)(q31.31;q24.1)                | 28% | 0.3        |
|         | 7q31.31q32.1 (118375331_129537957)x1 | 43% | 0.99       | 7q31.31q32.1 (118375331_129537957)x1 | 48% | 1          |
|         | (8)x3                                | 49% | 1          | (8)x3                                | 43% | 1          |
|         | 11q23.2q23.3(113532792_115861804)x1  | 45% | 1          | 11q23.2q24.1(113528118_122641085)x1  | 46% | 1          |
| 11      | 7q34q35(142383192_144044869)x1       | 34% | 1          | 7q34q35(142359655_144082533)x1       | 37% | 1          |
|         | t(7;13)(q34;q14.2)                   | 40% | 1          | t(7;13)(q34;q14.2)                   | 36% | 0.39       |
|         | 13q14.13q14.2(45449589_48811560)x1   | 39% | 1          | 13q14.13q14.2(45284560_48793119)x1   | 37% | 1          |
|         | 20q11.21q11.22(32412577_34753168)x1  | 38% | 1          | 20q11.21q11.22(32412577_34729749)x1  | 36% | 1          |
| 12      | No relevant SVs detected             | -   | -          | No relevant SVs detected             | -   | -          |
| 13      | No relevant SVs detected             | -   | -          | No relevant SVs detected             | -   | -          |
| 14      | No relevant SVs detected             | -   | -          | No relevant SVs detected             | -   | -          |
| 15      | No relevant SVs detected             | -   | -          | No relevant SVs detected             | -   | -          |

**Table S2:** Comparison between rare variant analysis y and the *de novo* assembly finding

| Patient | Rare variant pipeline                 |     |            | De novo assembly                     |     |            |
|---------|---------------------------------------|-----|------------|--------------------------------------|-----|------------|
|         | SV                                    | VAF | Confidence | SV                                   | VAF | Confidence |
| 16      | 2p23.3p23.2(27431781_28419901)x1      | 35% | 1          | 2p23.3p23.2(27431781_28418674)x1     | 35% | 1          |
|         | 14q32.12q32.31 (92912843_102275947)x1 | 29% | 1          | 14q32.2q32.31(100650415_102282650)x1 | 31% | 1          |
|         | t(2;14)(p23.2;q32.12)                 | 42% | 0.99       | t(2;14)(p23.2;q32.12)                | 27% | 0.04       |
| 17      | No relevant SVs detected              | -   | -          | No relevant SVs detected             | -   | -          |
| 18      | No relevant SVs detected              | -   | -          | No relevant SVs detected             | -   | -          |
| 19      | (9)x3                                 | 9%  | 0.1        | (9)x3                                | 7%  | 0.84       |
|         | 20q11.21q13.32(31688875_58520469)x1   | 18% | 1          | 20q11.21q13.32(31971356_58555654)x1  | 17% | 1          |
| 20      | No relevant SVs detected              | -   | -          | No relevant SVs detected             | -   | -          |
| 21      | t(1;12)(p35.2;q13.13)                 | 5%  | 0.22       | No relevant SVs detected             | -   | -          |
|         | t(1;14)(p35.2;q32.31)                 | 14% | 0.98       | No relevant SVs detected             | -   | -          |

**Table S2: Cont.**

| Patient | OGM new findings                                                                  | Validation technique                                                                                               | Validation result                                                                                                                                                                                                 | Interpretation                                                                            |
|---------|-----------------------------------------------------------------------------------|--------------------------------------------------------------------------------------------------------------------|-------------------------------------------------------------------------------------------------------------------------------------------------------------------------------------------------------------------|-------------------------------------------------------------------------------------------|
| 4       | 1q21.2q23.2x3,<br>t(12;17)(q24.31;p13.1)                                          | FISH<br>ZytoLight® SPEC MEF2D/BCL9<br>TriCheck™<br>Metasystems XCP12 green and XCP17<br>orange                     | nuc ish(MEF2Dx3,BCL9x3)[15/100]<br>46,XX.ish t(12;17)(q24.31;p13.1) (wcp12+,wcp17-)                                                                                                                               | Confirmed                                                                                 |
| 5       | 1q21.1q44x3,<br>7q11.21q36.3x1<br>(9)x3                                           | SNP array                                                                                                          | arr[GRCh38] 1q21.3(151945023_248808397)x3<br>arr[GRCh38] 7q11.21 q35 (66023357_146394056)x1<br>arr[GRCh38] (9)x3                                                                                                  | Confirmed                                                                                 |
| 6       | 4q24x1                                                                            | FISH<br>Metasystems XL TET2 locus-specific<br>probe                                                                | nuc ish (TET2x1)[10/100]                                                                                                                                                                                          | Confirmed                                                                                 |
| 9       | 9p24.2p13.3x2 hnz                                                                 | SNP array                                                                                                          | arr[GRCh38] 9p24.3p21.1(216,124_33,190,241)x2 hnz                                                                                                                                                                 | Confirmed                                                                                 |
| 10      | t(2;11)(q37.1;q23.2)<br>t(7;11)(q31.31;q24.1)<br>7q31.31q32.1x1<br>11q23.2q24.1x1 | FISH<br>Metasystems XCP2 green and XCP11<br>orange<br>Metasystems XCP7 orange and XCP11<br>green<br>+<br>SNP array | 46,XY. ish t(2;11)(q37.1;q23.2) ) (wcp2+,wcp11-)<br>46,XY. ish t(7;11)(q31.31;q24.1) (wcp7+,wcp11-)<br>arr[GRCh38] 7q31.31q32.1(120,408,852_129,549,635)x1<br>arr[GRCh38] 11q23.2q24.1(113,579,228_122,624,689)x1 | Confirmed                                                                                 |
| 11      | 7q34q35x1<br>13q14.13q14.2x1<br>20q11.21q11.22x                                   | SNP array                                                                                                          | arr[GRCh38] 7q34q35 (1142359655_144082533)<br>arr[GRCh38] 13q14.13q14.2x1(45284560_48793119)<br>arr[GRCh38] 20q11.21q11.22x1(32412577_34729749)                                                                   | Confirmed                                                                                 |
| 16      | 2p23.3p23.2x1<br>14q32.12q32.31x1<br>t(2;14)(p23.2;q32.12)                        | FISH<br>Metasystems XCP2 green and XCP14<br>orange<br>+<br>SNP array                                               | arr[GRCh38] 2p23.3p23.2(27,533,582_28,419,761)x1<br>arr[GRCh38] 14q32.2q32.31(100,713,259_102,249,264)x1                                                                                                          | t(2;14) not confirmed by FISH<br>Losses in chromosomes 2 and 14 confirmed by SNP<br>array |
| 19      | 20q11.21q13.32x1                                                                  | FISH                                                                                                               | nuc ish<br>(D8Z1x2,D20S108/D20S858x1,RH74808/RH67654x2)[20/100]                                                                                                                                                   | Confirmed                                                                                 |

**Table S3:** Validation of results.

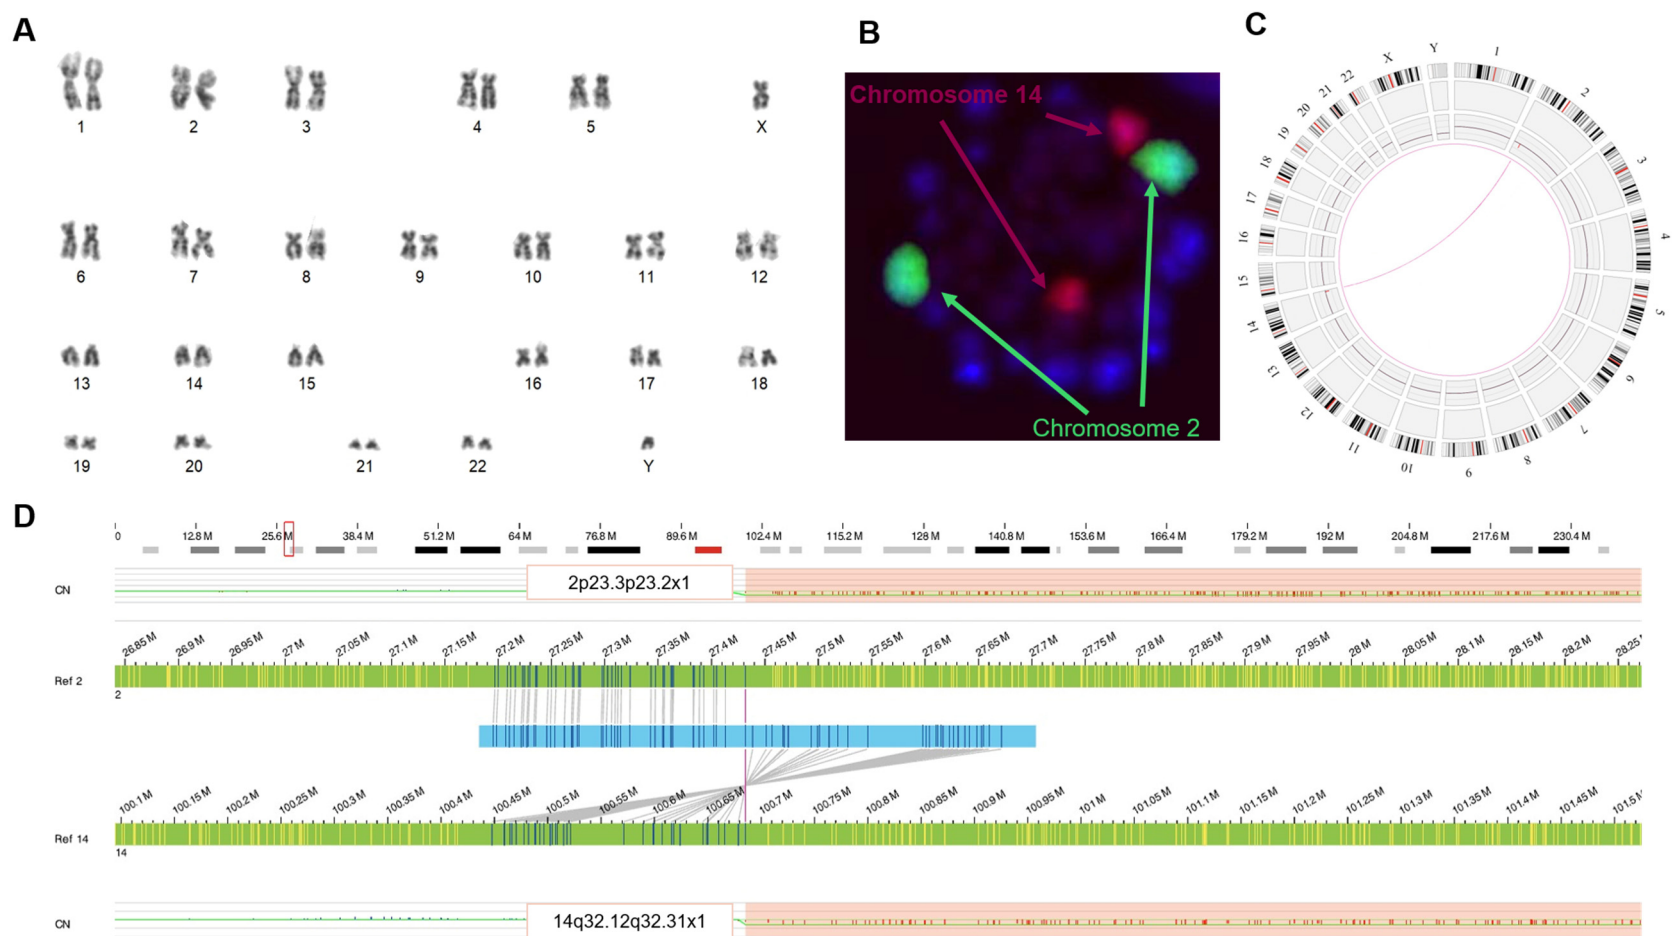

**Figure S1:** Patient #16 and discordance between CBA & FISH vs OGM. (a) CBA reveals a 46,XY [20] karyotype. (b) Metaphase FISH with whole chromosome painting failed to detect t(2;14)(p23.2;q32.12). (c) Circos plot showing the translocation t(2;14)(p23.2;q32.12) with material losses in adjacent regions. (d). Detail of the translocation detected by OGM.
